# Supplementary material for: Temperature dependence of the viscoelastic properties of a natural gastropod mucus by Brillouin light scattering spectroscopy
Source: Royal Society of Chemistry journal article supplement (doi:10.1039/d3sm00762f), 2023-01-01
Supplement: d3sm00762f1.pdf [file d3sm00762f1.pdf]

## Supplementary Material for: Temperature Dependence of the Viscoelastic Properties of a Natural Gastropod Mucus by Brillouin Light Scattering Spectroscopy

Dillon F. Hanlon,\* Maynard J. Clouter, and G. Todd Andrews

*Department of Physics and Physical Oceanography,*

*Memorial University of Newfoundland and Labrador, St. John's, NL, Canada, A1B 3X7 and*

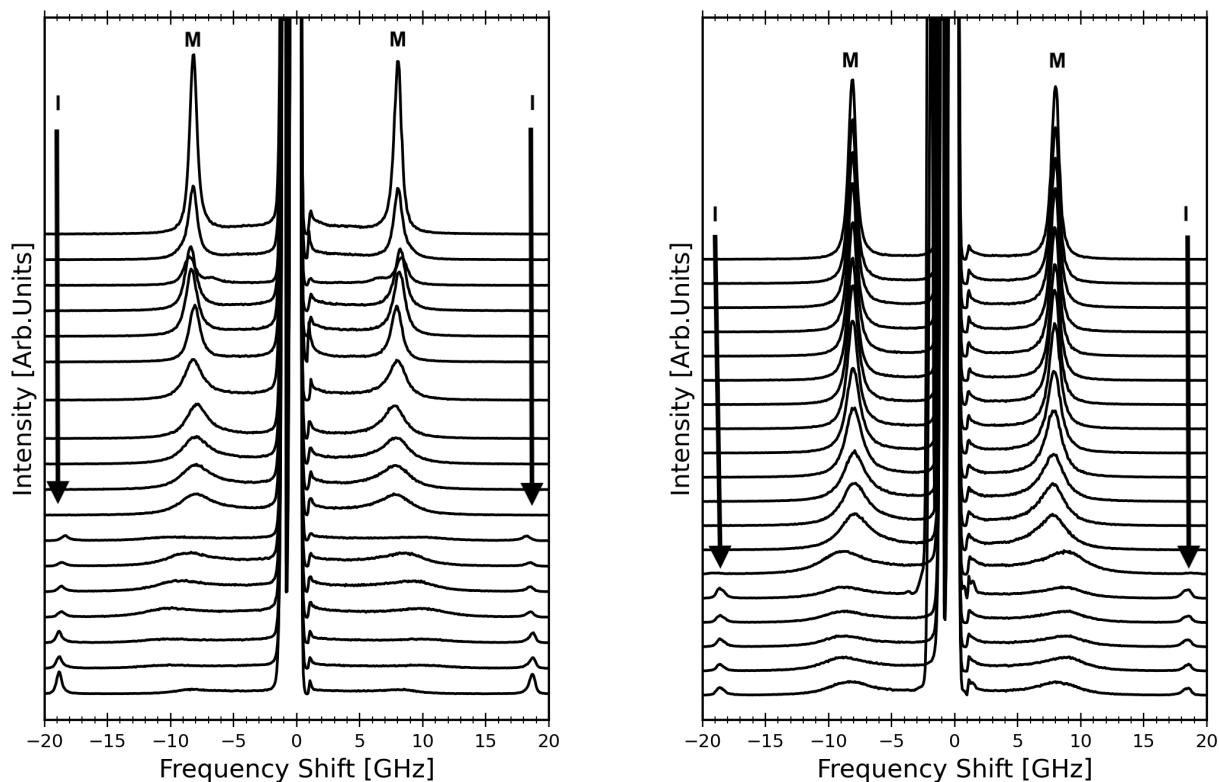

FIG. S1. Brillouin spectra of a natural snail mucus collected at the indicated temperatures. Left - Sample #1; Right - Sample #3.

\* dfh031@mun.ca

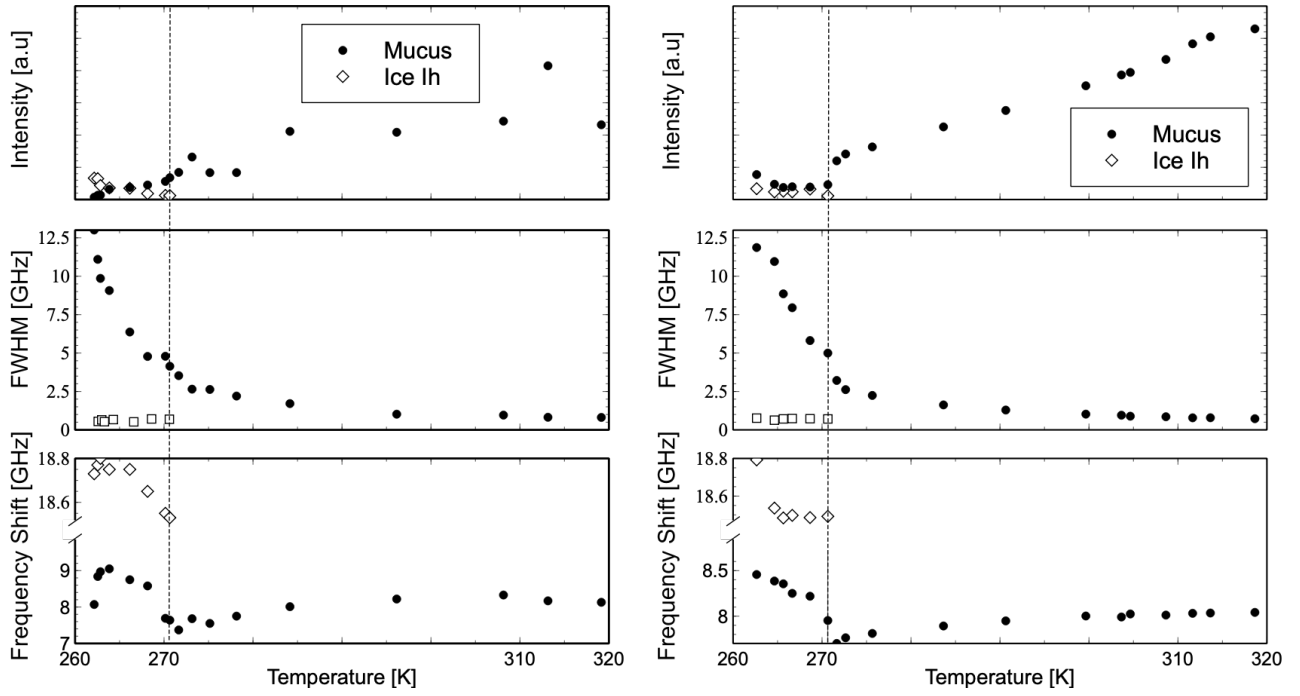

FIG. S2. Temperature dependence of integrated intensity, linewidth (FWHM), and frequency shift of Brillouin peaks for a natural snail mucus. Left - Sample #1; Right - Sample #3. The dashed vertical line indicates the phase transition at  $-2.5^{\circ}\text{C}$ .

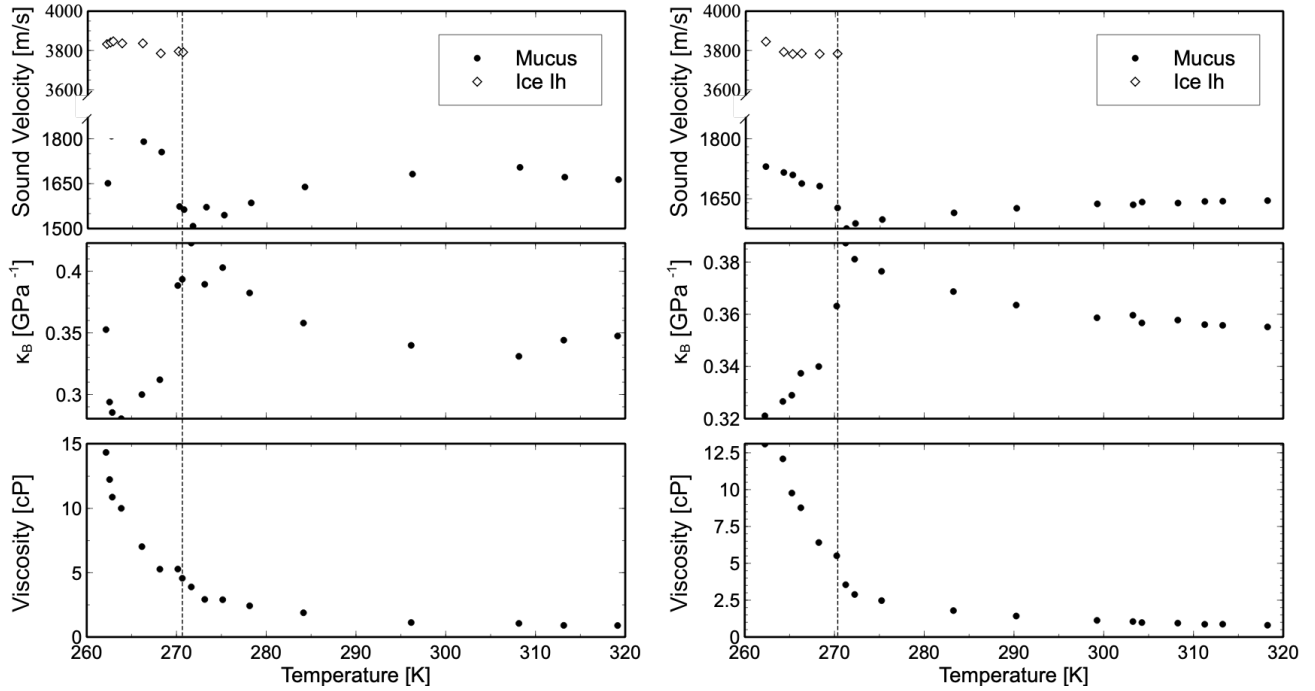

FIG. S3. Temperature dependence of hypersound velocity, adiabatic compressibility, and apparent viscosity of a natural snail mucus. Left - Sample #1; Right - Sample #3. The dashed vertical line indicates the phase transition at  $-2.5^{\circ}\text{C}$ .

TABLE S1. Brillouin peak frequency shift ( $f_M$ ,  $f_I$ ), full width at half-maximum ( $\Delta f_M$ ,  $\Delta f_I$ ), and intensity ( $I_M$ ,  $I_I$ ) for Sample #1 at the indicated temperatures.  $M$  - liquid mucus phase; and  $I$  - ice-like solid phase.

| $T$<br>[ $\pm 0.5$ K] | $T$<br>[ $\pm 0.5^\circ\text{C}$ ] | $f_M$<br>[ $\pm 0.3$ GHz] | $f_I$<br>[ $\pm 0.1$ GHz] | $\Delta f_M$<br>[GHz] | $\Delta f_I$<br>[ $\pm 0.3$ GHz] | $I_M$<br>[Arb. Units] | $I_I$<br>[Arb. Units] |
|-----------------------|------------------------------------|---------------------------|---------------------------|-----------------------|----------------------------------|-----------------------|-----------------------|
| 324.0                 | 51.0                               | 8.1                       | —                         | 0.7(3)                | —                                | 13080(10)             | —                     |
| 319.0                 | 46.0                               | 8.1                       | —                         | 0.8(3)                | —                                | 5800(10)              | —                     |
| 313.0                 | 40.0                               | 8.2                       | —                         | 0.8(3)                | —                                | 10374(10)             | —                     |
| 308.0                 | 35.0                               | 8.3                       | —                         | 1.0(3)                | —                                | 6080(10)              | —                     |
| 296.0                 | 23.0                               | 8.2                       | —                         | 1.0(3)                | —                                | 5220(10)              | —                     |
| 284.0                 | 11.0                               | 8.0                       | —                         | 1.7(3)                | —                                | 5280(10)              | —                     |
| 278.0                 | 5.0                                | 7.8                       | —                         | 2.2(3)                | —                                | 2090(10)              | —                     |
| 275.0                 | 2.0                                | 7.6                       | —                         | 2.6(3)                | —                                | 2090(10)              | —                     |
| 273.0                 | 0.0                                | 7.7                       | —                         | 2.7(4)                | —                                | 3200(20)              | —                     |
| 272.0                 | -1.5                               | 7.4                       | —                         | 3.5(5)                | —                                | 2110(20)              | —                     |
| 271.0                 | -2.5                               | 7.6                       | 18.5                      | 4.1(5)                | 0.5                              | 1700(20)              | —                     |
| 270.0                 | -3.0                               | 7.7                       | 18.6                      | 4.8(3)                | 0.5                              | 1410(20)              | 320(20)               |
| 268.0                 | -5.0                               | 8.6                       | 18.5                      | 5(1)                  | 0.5                              | 1130(20)              | 460(20)               |
| 266.0                 | -7.0                               | 8.8                       | 18.8                      | 6(2)                  | 0.6                              | 930(20)               | 870(20)               |
| 263.7                 | -9.3                               | 9.1                       | 18.8                      | 9(2)                  | 0.6                              | 790(20)               | 900(20)               |
| 262.7                 | -10.3                              | 9.0                       | 18.8                      | 10(2)                 | 0.5                              | 350(20)               | 1090(10)              |
| 262.4                 | -10.6                              | 8.8                       | 18.9                      | 11(3)                 | 0.5                              | 230(30)               | 1620(10)              |
| 262.0                 | -11.0                              | 8.1                       | 18.7                      | 13(4)                 | 0.5                              | 180(30)               | 1660(10)              |

TABLE S2. Brillouin peak frequency shift ( $f_M$ ,  $f_I$ ), full width at half-maximum ( $\Delta f_M$ ,  $\Delta f_I$ ), and intensity ( $I_M$ ,  $I_I$ ) for Sample #2 at the indicated temperatures.  $M$  - liquid mucus phase; and  $I$  - ice-like solid phase.

| $T$<br>[ $\pm 0.5$ K] | $T$<br>[ $\pm 0.5^\circ\text{C}$ ] | $f_M$<br>[ $\pm 0.3$ GHz] | $f_I$<br>[ $\pm 0.1$ GHz] | $\Delta f_M$<br>[GHz] | $\Delta f_I$<br>[ $\pm 0.3$ GHz] | $I_M$<br>[Arb. Units] | $I_I$<br>[Arb. Units] |
|-----------------------|------------------------------------|---------------------------|---------------------------|-----------------------|----------------------------------|-----------------------|-----------------------|
| 322.0                 | 49.0                               | 8.1                       | —                         | 0.6(2)                | —                                | 10070(10)             | —                     |
| 317.0                 | 44.0                               | 8.1                       | —                         | 0.7(2)                | —                                | 9350(10)              | —                     |
| 316.0                 | 43.0                               | 8.0                       | —                         | 0.7(2)                | —                                | 8720(10)              | —                     |
| 312.0                 | 39.0                               | 8.0                       | —                         | 0.8(3)                | —                                | 7990(10)              | —                     |
| 310.0                 | 37.0                               | 8.0                       | —                         | 0.8(2)                | —                                | 8150(10)              | —                     |
| 307.0                 | 34.0                               | 8.0                       | —                         | 0.8(3)                | —                                | 6770(10)              | —                     |
| 306.0                 | 33.0                               | 8.0                       | —                         | 0.9(3)                | —                                | 8130(10)              | —                     |
| 303.0                 | 30.0                               | 8.0                       | —                         | 1.0(3)                | —                                | 6830(10)              | —                     |
| 301.0                 | 28.0                               | 8.0                       | —                         | 0.9(3)                | —                                | 7800(10)              | —                     |
| 298.0                 | 25.0                               | 8.0                       | —                         | 1.0(3)                | —                                | 6500(10)              | —                     |
| 296.0                 | 23.0                               | 8.0                       | —                         | 0.9(3)                | —                                | 8330(20)              | —                     |
| 288.0                 | 15.0                               | 7.9                       | —                         | 1.4 (3)               | —                                | 4770(10)              | —                     |
| 280.0                 | 7.0                                | 7.8                       | —                         | 1.9(3)                | —                                | 3710(20)              | —                     |
| 274.0                 | 1.0                                | 7.7                       | —                         | 2.6(3)                | —                                | 2910(20)              | —                     |
| 272.0                 | -1.0                               | 7.7                       | —                         | 2.9(4)                | —                                | 2710(30)              | —                     |
| 270.5                 | -2.5                               | 7.6                       | —                         | 3.6(4)                | —                                | 2220(30)              | —                     |
| 270.0                 | -3.0                               | 7.9                       | 18.6                      | 5.8(5)                | 0.7                              | 1080(30)              | 320(10)               |
| 267.0                 | -6.0                               | 8.2                       | 18.6                      | 7.4(5)                | 0.7                              | 1120(30)              | 350(10)               |
| 266.0                 | -7.0                               | 8.6                       | 18.7                      | 9(2)                  | 0.5                              | 920(30)               | 370(10)               |
| 264.0                 | -9.0                               | 8.4                       | 18.7                      | 10(2)                 | 0.7                              | 910(40)               | 380(10)               |
| 262.7                 | -10.3                              | 8.6                       | 18.8                      | 11(2)                 | 0.5                              | 430(40)               | 890(10)               |
| 262.4                 | -10.6                              | 8.6                       | 18.7                      | 12(3)                 | 0.7                              | 430(40)               | 750(10)               |
| 262.0                 | -11.0                              | 8.4                       | 18.8                      | 13(3)                 | 0.6                              | 310(40)               | 1650(10)              |

TABLE S3. Brillouin peak frequency shift ( $f_M, f_I$ ), full width at half-maximum ( $\Delta f_M, \Delta f_I$ ), and intensity ( $I_M, I_I$ ) for Sample #3 at the indicated temperatures.  $M$  - liquid mucus phase; and  $I$  - ice-like solid phase.

| $T$<br>[ $\pm 0.5$ K] | $T$<br>[ $\pm 0.5^\circ\text{C}$ ] | $f_M$<br>[ $\pm 0.3$ GHz] | $f_I$<br>[ $\pm 0.1$ GHz] | $\Delta f_M$<br>[GHz] | $\Delta f_I$<br>[ $\pm 0.3$ GHz] | $I_M$<br>[Arb. Units] | $I_I$<br>[Arb. Units ] |
|-----------------------|------------------------------------|---------------------------|---------------------------|-----------------------|----------------------------------|-----------------------|------------------------|
| 323.0                 | 50.0                               | 8.1                       | —                         | 0.7(3)                | —                                | 14570(20)             | —                      |
| 318.0                 | 45.0                               | 8.0                       | —                         | 0.7(3)                | —                                | 13240(20)             | —                      |
| 313.0                 | 40.0                               | 8.0                       | —                         | 0.8(3)                | —                                | 12620(20)             | —                      |
| 311.0                 | 38.0                               | 8.0                       | —                         | 0.8(3)                | —                                | 12070(20)             | —                      |
| 308.0                 | 35.0                               | 8.0                       | —                         | 0.9(6)                | —                                | 10860(20)             | —                      |
| 304.0                 | 31.0                               | 8.0                       | —                         | 0.9(5)                | —                                | 9860(20)              | —                      |
| 303.0                 | 30.0                               | 8.0                       | —                         | 1.0(5)                | —                                | 9660(20)              | —                      |
| 299.0                 | 26.0                               | 8.0                       | —                         | 1.0(4)                | —                                | 8820(20)              | —                      |
| 290.0                 | 17.0                               | 7.9                       | —                         | 1.3(5)                | —                                | 6910(20)              | —                      |
| 283.0                 | 10.0                               | 7.9                       | —                         | 1.6(5)                | —                                | 5630(30)              | —                      |
| 275.0                 | 2.0                                | 7.8                       | —                         | 2.2(6)                | —                                | 4080(30)              | —                      |
| 272.0                 | -1.0                               | 7.8                       | —                         | 2.6(5)                | —                                | 3530(30)              | —                      |
| 271.0                 | -2.5                               | 7.7                       | —                         | 3.2(6)                | —                                | 3000(20)              | —                      |
| 270.0                 | -3.0                               | 8.0                       | 18.5                      | 5(1)                  | 0.7                              | 1150(30)              | 290(10)                |
| 268.0                 | -5.0                               | 8.2                       | 18.5                      | 6(2)                  | 0.7                              | 970(30)               | 810(10)                |
| 266.0                 | -7.0                               | 8.3                       | 18.5                      | 8(2)                  | 0.7                              | 990(30)               | 600(10)                |
| 265.0                 | -8.0                               | 8.4                       | 18.5                      | 9(2)                  | 0.7                              | 930(30)               | 650(10)                |
| 264.0                 | -9.0                               | 8.4                       | 18.6                      | 11(3)                 | 0.6                              | 1190(30)              | 590(10)                |
| 262.0                 | -11.0                              | 8.5                       | 18.8                      | 12(4)                 | 0.8                              | 1940(30)              | 840(10)                |
